# Supplementary material for: Size-dependent strong metal–support interaction in Pd/ZnO catalysts for hydrogenation of CO2to methanol
Source: Royal Society of Chemistry journal article supplement (doi:10.1039/d1cy00606a), 2021-01-01
Supplement: d1cy00606a1.pdf [file d1cy00606a1.pdf]

## Supporting Information

### **Size-dependent strong metal-support interaction in Pd/ZnO catalysts for hydrogenation of CO<sub>2</sub> to methanol**

Liangcai Zhang,<sup>a</sup> Xinyu Liu,<sup>a</sup> Hengwei Wang,<sup>a</sup> Lina Cao,<sup>a</sup> Chenxi Huang,<sup>b</sup> Shang Li,<sup>a</sup> Xiaohui Zhang,<sup>a</sup> Qiaoqiao Guan,<sup>a</sup> Xiang Shao,<sup>\*b</sup> and Junling Lu<sup>\*a</sup>

<sup>a</sup>. Department of Chemical Physics, Hefei National Laboratory for Physical Sciences at the Microscale, iChEM, University of Science and Technology of China, Hefei, Anhui 230026, P. R. China.

<sup>b</sup>. Department of Chemical Physics, Synergetic Innovation Center of Quantum Information and Quantum Physics, and CAS Key Laboratory of Urban Pollutant Conversion, University of Science and Technology of China, Hefei, Anhui 230026.

\* To whom correspondence should be addressed: [junling@ustc.edu.cn](mailto:junling@ustc.edu.cn) and [shaox@ustc.edu.cn](mailto:shaox@ustc.edu.cn)

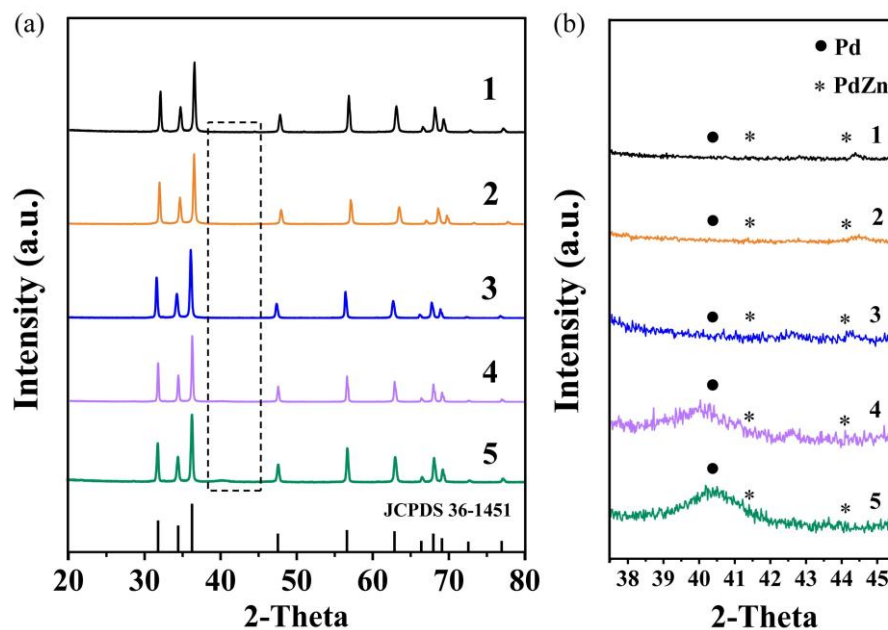

**Fig. S1.** (a) XRD patterns of the reduced Pd/ZnO catalysts with different size of Pd particles: (1) 1.6 nm, (2) 2.5 nm, (3) 3.3 nm, (4) 5.8 nm, (5) 7.9 nm. (b) Enlarged XRD patterns of the dashed area in (a).

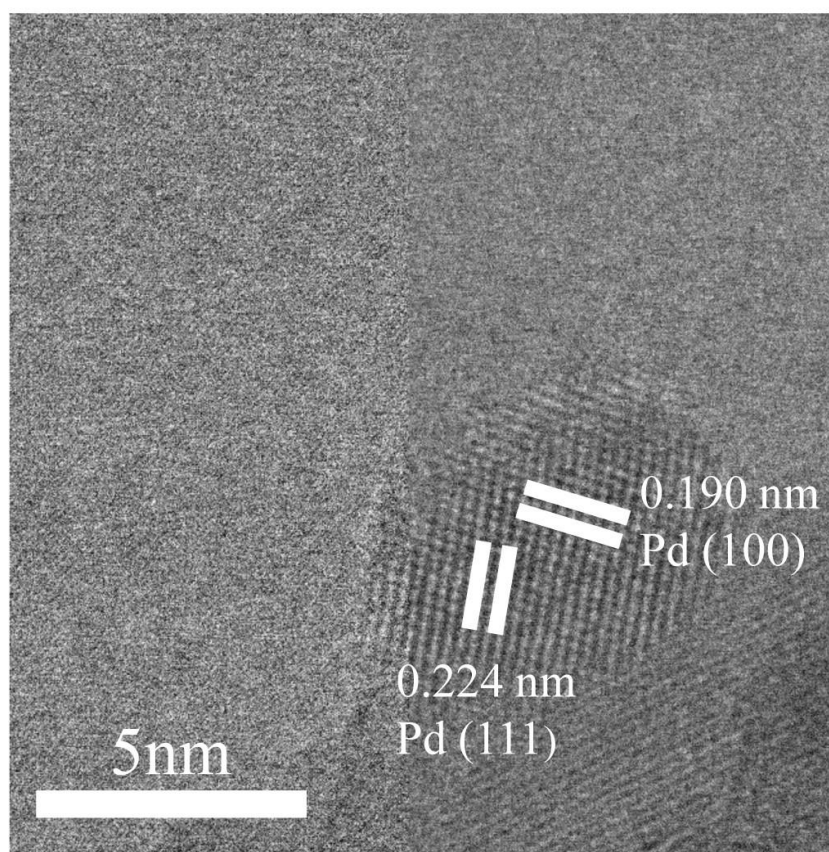

**Fig. S2.** A representative HRTEM image of the 7.9-nm Pd/ZnO catalyst after reduction in hydrogen at 250 °C.

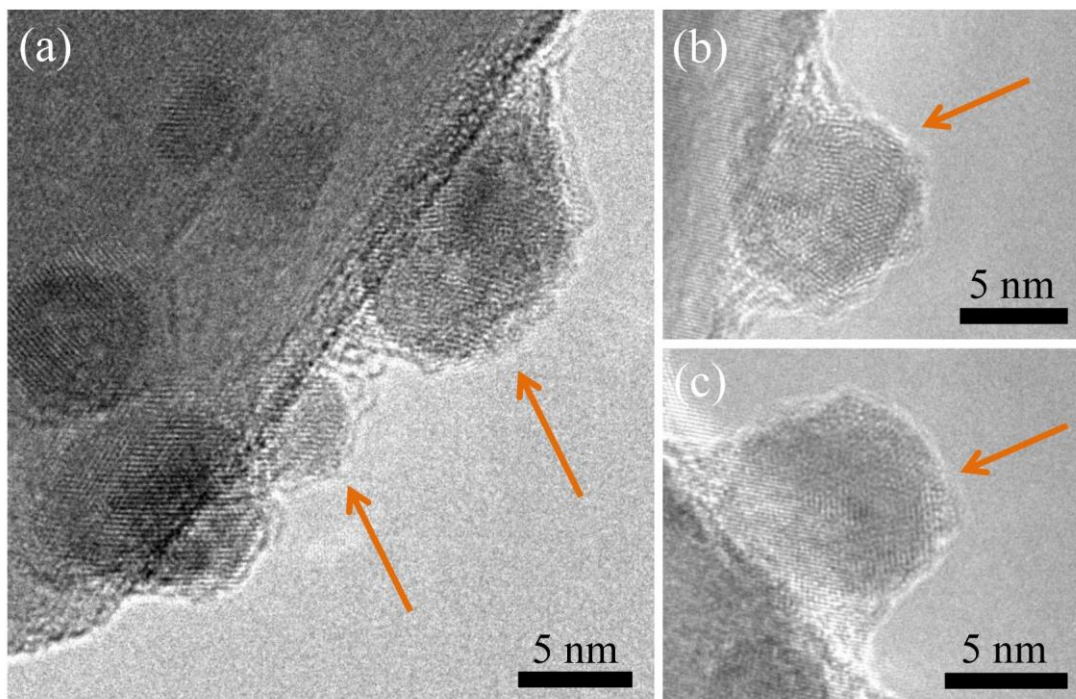

**Fig. S3.** Representative HRTEM images of the 7.9-nm Pd/ZnO catalyst after reduction in hydrogen at 250 °C at other locations. Arrows in panels indicate the ZnO overlayer via SMSI.

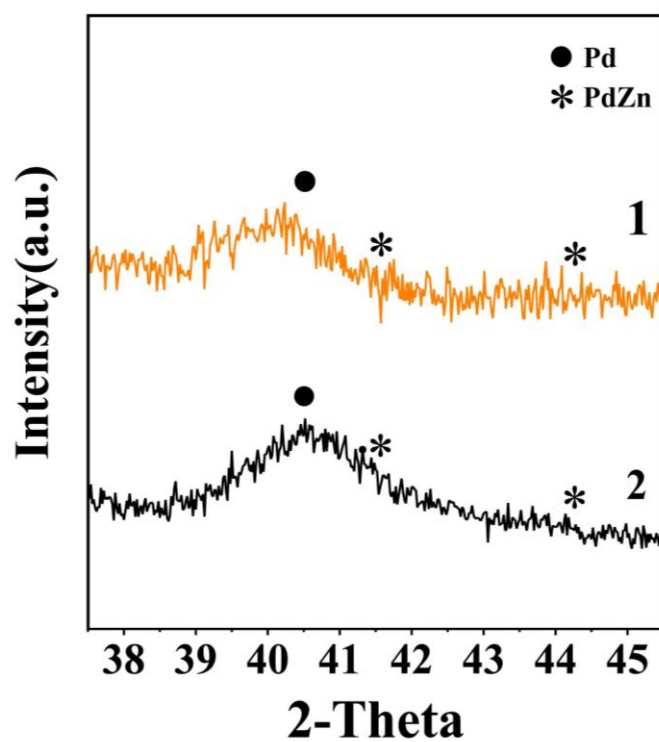

**Fig. S4.** Magnified XRD spectra of the 5.8-nm Pd/ZnO (1) and the 7.9-nm Pd/ZnO catalyst (2) after subjected to the CO<sub>2</sub> hydrogenation reaction at 250 °C.

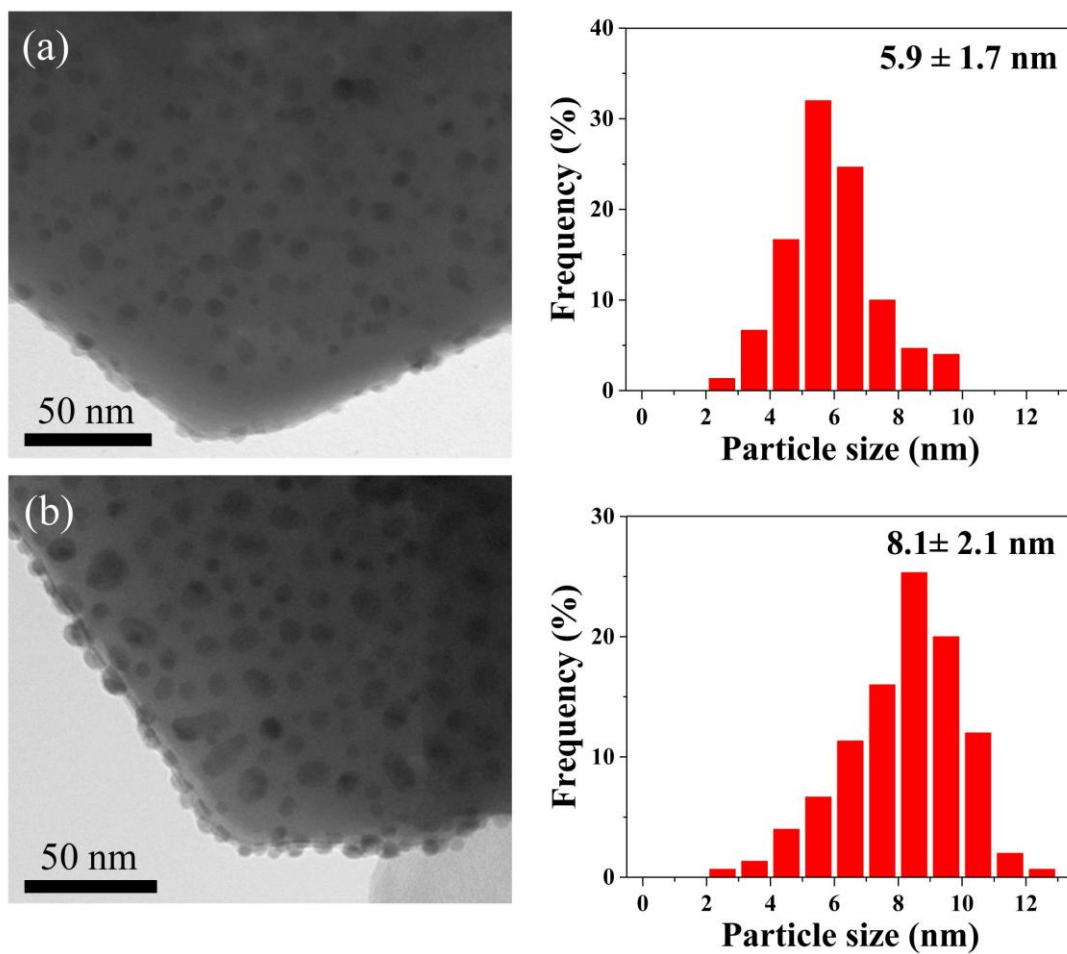

**Fig. S5.** HRTEM images and the statistical histograms of Pd particle size of (a) 5.8, and (b) 7.9-nm Pd/ZnO catalysts after the CO<sub>2</sub> hydrogenation reaction at 250 °C.

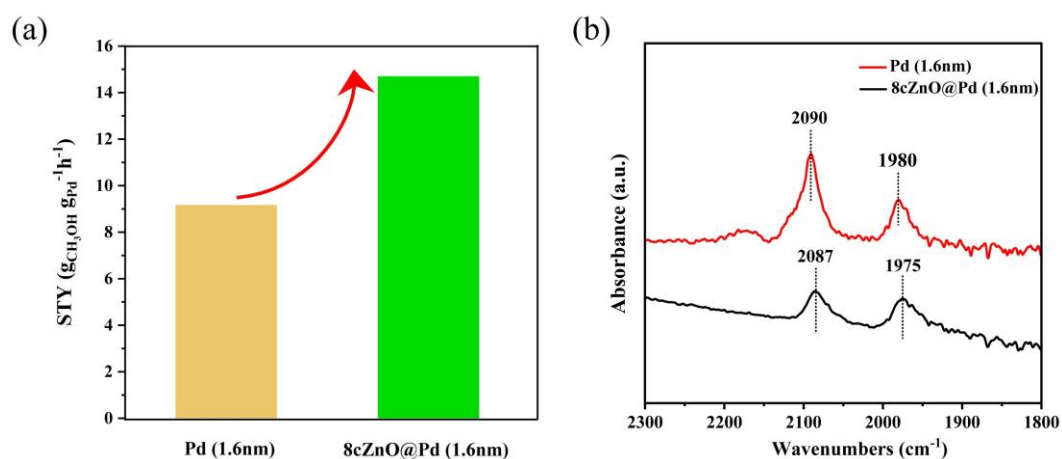

**Fig. S6.** (a) STY of methanol on 1.6-nm Pd/ZnO and 1.6-nm Pd/ZnO@8cZnO. (b) DRIFTS of CO chemisorption on 1.6-nm Pd/ZnO and 1.6-nm Pd/ZnO@8cZnO after reduction in hydrogen at 250 °C at the saturation coverage.

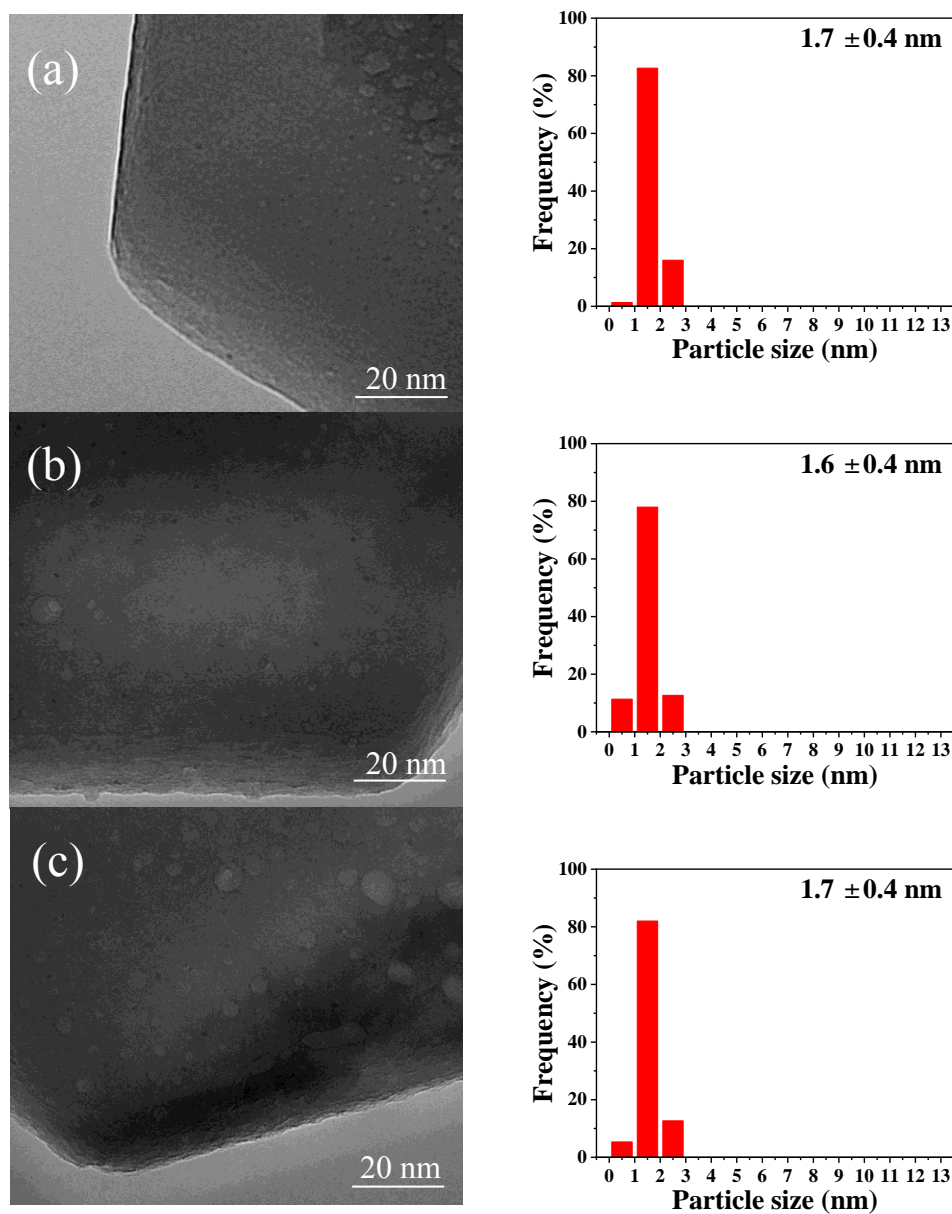

**Fig. S7.** HRTEM images and the statistical histograms of Pd particle size of the (a) 1.6-nm Pd/ZnO catalyst after the CO<sub>2</sub> hydrogenation reaction at 250 °C, (b) 1.6-nm Pd/ZnO@8cZnO catalyst after reduction in hydrogen at 250 °C, and (c) 1.6-nm Pd/ZnO@8cZnO catalyst after the CO<sub>2</sub> hydrogenation reaction at 250 °C.

**Table S1. Pd content and dispersion over Pd-ZnO catalysts.**

| Catalyst | Cycles<br>of Pd<br>ALD | Pd particle<br>size (nm) <sup>a</sup> | Pd particle<br>size (nm) <sup>b</sup> | Pd content<br>(wt%) <sup>c</sup> | Dispersion (%) <sup>d</sup> |        |
|----------|------------------------|---------------------------------------|---------------------------------------|----------------------------------|-----------------------------|--------|
|          |                        |                                       |                                       |                                  | 150 °C                      | 250 °C |
| Pd/ZnO   | 1                      | 1.6                                   | 1.6                                   | 0.27                             | 65.93                       | 53.44  |
|          | 3                      | 2.5                                   | 2.4                                   | 0.41                             | 44.00                       | 19.14  |
|          | 4                      | 3.3                                   | 3.1                                   | 0.76                             | 34.38                       | 15.65  |
|          | 10                     | 5.8                                   | 6.7                                   | 2.48                             | 15.65                       | 7.14   |
|          | 15                     | 7.9                                   | 12.6                                  | 5.21                             | 8.38                        | 2.67   |

<sup>a</sup> Determined by TEM measurements.

<sup>b</sup> Calculated based on the Pd dispersion.

<sup>c</sup> Determined by ICP results.

<sup>d</sup> Pd dispersion determined by CO pulse chemisorption.

**Table S2. Catalytic performance of the 1.6-nm Pd/ZnO and 1.6-nm Pd/ZnO@-8cZnO catalysts in the reaction of CO<sub>2</sub> hydrogenation<sup>a</sup>.**

| Catalyst            | Pd content (wt%) <sup>b</sup> | CO <sub>2</sub> conversion (%) | CH <sub>3</sub> OH selectivity (%) |
|---------------------|-------------------------------|--------------------------------|------------------------------------|
| 1.6-nm Pd/ZnO       | 0.27                          | 1.38                           | 35                                 |
| 1.6-nm Pd/ZnO@8cZnO | 0.26                          | 1.71                           | 44                                 |

<sup>a</sup> Reaction Conditions: catalyst, 60 mg; 1CO<sub>2</sub>: 3H<sub>2</sub> mixture, 15 mL/min; 250 °C, 4.5 MPa. All catalysts were pre-treated in situ at 250 °C with H<sub>2</sub> flow for 30 min.

<sup>b</sup> Determined by ICP results.
